# Supplementary material for: Neuroscience Workshops for Fifth-Grade School Children by Undergraduate Students: A University–School Partnership
Source: Atypon-hosted journal article supplement (doi:10.1187/cbe.05-08-0107), 2006-06-01
Supplement: supplementalmateriala.pdf [file supplementalmateriala.pdf]

## Appendix A

## Resources for Developing a Neuroscience Workshop

| <i>Workshop Goals Preparation</i>                                    | <i>Website</i>                                                                                                                                                                                                                                                                                                                                                                                                                                                                                                                                                                                                                                                                                                                                                                                                                                                                                                                                                                                                                                                                                                                                                                                                                                                                                                                                                                                                                                                                    |
|----------------------------------------------------------------------|-----------------------------------------------------------------------------------------------------------------------------------------------------------------------------------------------------------------------------------------------------------------------------------------------------------------------------------------------------------------------------------------------------------------------------------------------------------------------------------------------------------------------------------------------------------------------------------------------------------------------------------------------------------------------------------------------------------------------------------------------------------------------------------------------------------------------------------------------------------------------------------------------------------------------------------------------------------------------------------------------------------------------------------------------------------------------------------------------------------------------------------------------------------------------------------------------------------------------------------------------------------------------------------------------------------------------------------------------------------------------------------------------------------------------------------------------------------------------------------|
| National Science Education Standards                                 | <a href="http://www.nap.edu/readingroom/books/nses/html/">http://www.nap.edu/readingroom/books/nses/html/</a>                                                                                                                                                                                                                                                                                                                                                                                                                                                                                                                                                                                                                                                                                                                                                                                                                                                                                                                                                                                                                                                                                                                                                                                                                                                                                                                                                                     |
| National Science Teachers Association                                | <a href="http://www.nsta.org/">http://www.nsta.org/</a>                                                                                                                                                                                                                                                                                                                                                                                                                                                                                                                                                                                                                                                                                                                                                                                                                                                                                                                                                                                                                                                                                                                                                                                                                                                                                                                                                                                                                           |
| State Standards (California)                                         | <a href="http://www.cde.ca.gov/be/st/ss/scmain.asp">http://www.cde.ca.gov/be/st/ss/scmain.asp</a>                                                                                                                                                                                                                                                                                                                                                                                                                                                                                                                                                                                                                                                                                                                                                                                                                                                                                                                                                                                                                                                                                                                                                                                                                                                                                                                                                                                 |
| AAAS guidelines for enhancing science literacy                       | <a href="http://www.project2061.org/default_flash.htm">http://www.project2061.org/default_flash.htm</a>                                                                                                                                                                                                                                                                                                                                                                                                                                                                                                                                                                                                                                                                                                                                                                                                                                                                                                                                                                                                                                                                                                                                                                                                                                                                                                                                                                           |
| Dana Alliance                                                        | <a href="http://www.dana.org">http://www.dana.org</a>                                                                                                                                                                                                                                                                                                                                                                                                                                                                                                                                                                                                                                                                                                                                                                                                                                                                                                                                                                                                                                                                                                                                                                                                                                                                                                                                                                                                                             |
| Brain Awareness Week                                                 | <a href="http://www.dana.org/brainweek/education.cfm">http://www.dana.org/brainweek/education.cfm</a>                                                                                                                                                                                                                                                                                                                                                                                                                                                                                                                                                                                                                                                                                                                                                                                                                                                                                                                                                                                                                                                                                                                                                                                                                                                                                                                                                                             |
| Society for Neuroscience                                             | <a href="http://web.sfn.org/">http://web.sfn.org/</a>                                                                                                                                                                                                                                                                                                                                                                                                                                                                                                                                                                                                                                                                                                                                                                                                                                                                                                                                                                                                                                                                                                                                                                                                                                                                                                                                                                                                                             |
|                                                                      |                                                                                                                                                                                                                                                                                                                                                                                                                                                                                                                                                                                                                                                                                                                                                                                                                                                                                                                                                                                                                                                                                                                                                                                                                                                                                                                                                                                                                                                                                   |
| <i>Resources for teaching basic information about the brain</i>      | <i>Website</i>                                                                                                                                                                                                                                                                                                                                                                                                                                                                                                                                                                                                                                                                                                                                                                                                                                                                                                                                                                                                                                                                                                                                                                                                                                                                                                                                                                                                                                                                    |
| Eric Chudler's Neuroscience for Kids                                 | <a href="http://faculty.washington.edu/chudler/neurok.html">http://faculty.washington.edu/chudler/neurok.html</a>                                                                                                                                                                                                                                                                                                                                                                                                                                                                                                                                                                                                                                                                                                                                                                                                                                                                                                                                                                                                                                                                                                                                                                                                                                                                                                                                                                 |
| BrainConnection                                                      | <a href="http://www.brainconnection.com/">http://www.brainconnection.com/</a>                                                                                                                                                                                                                                                                                                                                                                                                                                                                                                                                                                                                                                                                                                                                                                                                                                                                                                                                                                                                                                                                                                                                                                                                                                                                                                                                                                                                     |
| Dana Alliance                                                        | <a href="http://www.dana.org/pdf/specialpublications/pub_sourcebook.pdf">http://www.dana.org/pdf/specialpublications/pub_sourcebook.pdf</a>                                                                                                                                                                                                                                                                                                                                                                                                                                                                                                                                                                                                                                                                                                                                                                                                                                                                                                                                                                                                                                                                                                                                                                                                                                                                                                                                       |
| neuron model                                                         | <a href="http://faculty.washington.edu/chudler/chmodel.html">http://faculty.washington.edu/chudler/chmodel.html</a>                                                                                                                                                                                                                                                                                                                                                                                                                                                                                                                                                                                                                                                                                                                                                                                                                                                                                                                                                                                                                                                                                                                                                                                                                                                                                                                                                               |
| video clips and videos/DVDs for purchase                             | <a href="http://www.pbs.org/wnet/brain/episode1/index.html">http://www.pbs.org/wnet/brain/episode1/index.html</a>                                                                                                                                                                                                                                                                                                                                                                                                                                                                                                                                                                                                                                                                                                                                                                                                                                                                                                                                                                                                                                                                                                                                                                                                                                                                                                                                                                 |
| Summaries of clinical neuroscience topics                            | <a href="http://apu.sfn.org/content/Publications/BrainBriefings/index_chronological.html">http://apu.sfn.org/content/Publications/BrainBriefings/index_chronological.html</a>                                                                                                                                                                                                                                                                                                                                                                                                                                                                                                                                                                                                                                                                                                                                                                                                                                                                                                                                                                                                                                                                                                                                                                                                                                                                                                     |
|                                                                      |                                                                                                                                                                                                                                                                                                                                                                                                                                                                                                                                                                                                                                                                                                                                                                                                                                                                                                                                                                                                                                                                                                                                                                                                                                                                                                                                                                                                                                                                                   |
| <i>Resources for teaching about brain disorders and disabilities</i> | <i>Website</i>                                                                                                                                                                                                                                                                                                                                                                                                                                                                                                                                                                                                                                                                                                                                                                                                                                                                                                                                                                                                                                                                                                                                                                                                                                                                                                                                                                                                                                                                    |
| Summaries of clinical neuroscience topics                            | <a href="http://apu.sfn.org/content/Publications/BrainBriefings/index_chronological.html">http://apu.sfn.org/content/Publications/BrainBriefings/index_chronological.html</a>                                                                                                                                                                                                                                                                                                                                                                                                                                                                                                                                                                                                                                                                                                                                                                                                                                                                                                                                                                                                                                                                                                                                                                                                                                                                                                     |
| ADD and ADHD                                                         | <a href="http://www.addmtc.com/tenneur.html">http://www.addmtc.com/tenneur.html</a> <a href="http://www.newideas.net/attention_deficit/neurology.htm">http://www.newideas.net/attention_deficit/neurology.htm</a><br><a href="http://www.healthyplace.com/Communities/add/addfocus/brain.htm">http://www.healthyplace.com/Communities/add/addfocus/brain.htm</a><br><a href="http://www.questia.com/PM.qst?a=o&amp;d=76975140">http://www.questia.com/PM.qst?a=o&amp;d=76975140</a> .                                                                                                                                                                                                                                                                                                                                                                                                                                                                                                                                                                                                                                                                                                                                                                                                                                                                                                                                                                                             |
| Brain disorders                                                      | <a href="http://www.nidcd.nih.gov/health/voice/tbrain.asp#1">http://www.nidcd.nih.gov/health/voice/tbrain.asp#1</a><br><a href="http://www.braininjurydisorders.org/tbi_7.html">http://www.braininjurydisorders.org/tbi_7.html</a><br><a href="http://health.allrefer.com/health/head-injury-head-injury.html">http://health.allrefer.com/health/head-injury-head-injury.html</a><br><a href="http://health.allrefer.com/health/head-injury-concussion.html">http://health.allrefer.com/health/head-injury-concussion.html</a><br><a href="http://health.allrefer.com/health/head-injury-intracerebellar-hemorrhage-ct-scan.html">http://health.allrefer.com/health/head-injury-intracerebellar-hemorrhage-ct-scan.html</a><br><a href="http://health.allrefer.com/health/head-injury-bicycle-helmet-proper-usage.html">http://health.allrefer.com/health/head-injury-bicycle-helmet-proper-usage.html</a><br><a href="http://health.allrefer.com/health/head-injury-indications-of-head-injury.html">http://health.allrefer.com/health/head-injury-indications-of-head-injury.html</a><br><a href="http://www.med.harvard.edu/publications/On_The_Brain/Volume4/Number3/Brain.html">http://www.med.harvard.edu/publications/On_The_Brain/Volume4/Number3/Brain.html</a><br><a href="http://intranet.micds.org/upper/health/Health-Web/Neil%20Health%20Page/research%20page.html">http://intranet.micds.org/upper/health/Health-Web/Neil%20Health%20Page/research%20page.html</a> |

|                                                              |                                                                                                                                                                                                                                                                                                                                                                                                                                                                                                                                                                                                                                                                                                                                                                                                                                                                                                                                                                                                                                                                                                                                                                                                                                                                                                                                                                                                                                                                                 |
|--------------------------------------------------------------|---------------------------------------------------------------------------------------------------------------------------------------------------------------------------------------------------------------------------------------------------------------------------------------------------------------------------------------------------------------------------------------------------------------------------------------------------------------------------------------------------------------------------------------------------------------------------------------------------------------------------------------------------------------------------------------------------------------------------------------------------------------------------------------------------------------------------------------------------------------------------------------------------------------------------------------------------------------------------------------------------------------------------------------------------------------------------------------------------------------------------------------------------------------------------------------------------------------------------------------------------------------------------------------------------------------------------------------------------------------------------------------------------------------------------------------------------------------------------------|
|                                                              |                                                                                                                                                                                                                                                                                                                                                                                                                                                                                                                                                                                                                                                                                                                                                                                                                                                                                                                                                                                                                                                                                                                                                                                                                                                                                                                                                                                                                                                                                 |
| MRI and PET scans                                            | <a href="http://www.med.umich.edu/lrc/coursepages/M1/anatomy/html/atlas/atlas_index.html">http://www.med.umich.edu/lrc/coursepages/M1/anatomy/html/atlas/atlas_index.html</a><br><a href="http://medstat.med.utah.edu/kw/brain_atlas/">http://medstat.med.utah.edu/kw/brain_atlas/</a><br><a href="http://www.med.harvard.edu/AANLIB/home.html">http://www.med.harvard.edu/AANLIB/home.html</a><br><a href="http://www.msu.edu/~brains/humanatlas/">http://www.msu.edu/~brains/humanatlas/</a><br><a href="http://www.med.univ-angers.fr/discipline/radiologie/Intlatlas/CadresAtlasI.html">http://www.med.univ-angers.fr/discipline/radiologie/Intlatlas/CadresAtlasI.html</a>                                                                                                                                                                                                                                                                                                                                                                                                                                                                                                                                                                                                                                                                                                                                                                                                 |
| Neurotransmitters                                            | <a href="http://depression.about.com/cs/brainchem101/a/brainchemistry.htm">http://depression.about.com/cs/brainchem101/a/brainchemistry.htm</a> ,<br><a href="http://www.healthyplace.com/Communities/add/addfocus/treatments_medications.htm">http://www.healthyplace.com/Communities/add/addfocus/treatments_medications.htm</a><br><a href="http://faculty.Washington.edu/chudler/chnt1.html">http://faculty.Washington.edu/chudler/chnt1.html</a>                                                                                                                                                                                                                                                                                                                                                                                                                                                                                                                                                                                                                                                                                                                                                                                                                                                                                                                                                                                                                           |
| Traumatic brain injury                                       | <a href="http://www.nidcd.nih.gov/health/voice/tbrain.asp#1">http://www.nidcd.nih.gov/health/voice/tbrain.asp#1</a> <a href="http://health.allrefer.com/health/head-injury-indications-of-head-injury.html">http://health.allrefer.com/health/head-injury-indications-of-head-injury.html</a><br><a href="http://www.braininjurydisorders.org/tbi_7.html">http://www.braininjurydisorders.org/tbi_7.html</a><br><a href="http://health.allrefer.com/health/head-injury-head-injury.html">http://health.allrefer.com/health/head-injury-head-injury.html</a><br><a href="http://www.med.harvard.edu/publications/On_The_Brain/Volume4/Number3/Brain.html">http://www.med.harvard.edu/publications/On_The_Brain/Volume4/Number3/Brain.html</a> ,<br><a href="http://intranet.micds.org/upper/health/Health-Web/Neil%20Health%20Page/research%20page.html">http://intranet.micds.org/upper/health/Health-Web/Neil%20Health%20Page/research%20page.html</a> , <a href="http://health.allrefer.com/health/head-injury-concussion.html">http://health.allrefer.com/health/head-injury-concussion.html</a><br><a href="http://health.allrefer.com/health/head-injury-intracerebellar-hemorrhage-ct-scan.html">http://health.allrefer.com/health/head-injury-intracerebellar-hemorrhage-ct-scan.html</a><br><a href="http://health.allrefer.com/health/head-injury-bicycle-helmet-proper-usage.html">http://health.allrefer.com/health/head-injury-bicycle-helmet-proper-usage.html</a> |
|                                                              |                                                                                                                                                                                                                                                                                                                                                                                                                                                                                                                                                                                                                                                                                                                                                                                                                                                                                                                                                                                                                                                                                                                                                                                                                                                                                                                                                                                                                                                                                 |
| <i>Resources for teaching about perception and illusions</i> | <i>Website</i>                                                                                                                                                                                                                                                                                                                                                                                                                                                                                                                                                                                                                                                                                                                                                                                                                                                                                                                                                                                                                                                                                                                                                                                                                                                                                                                                                                                                                                                                  |
| Hidden images                                                | <a href="http://blogs.mit.edu/shahab/posts/13887.aspx">http://blogs.mit.edu/shahab/posts/13887.aspx</a> ,<br><a href="http://members.lycos.co.uk/bisray/optill/othis.htm">http://members.lycos.co.uk/bisray/optill/othis.htm</a><br><a href="http://www.coolopticalillusions.com/crazy/hidden_faces.htm">http://www.coolopticalillusions.com/crazy/hidden_faces.htm</a>                                                                                                                                                                                                                                                                                                                                                                                                                                                                                                                                                                                                                                                                                                                                                                                                                                                                                                                                                                                                                                                                                                         |
| Illusions                                                    | <a href="http://www.brainconnection.com/library/?main=playhome/illusions">http://www.brainconnection.com/library/?main=playhome/illusions</a><br><a href="http://www.grand-illusions.com">http://www.grand-illusions.com</a><br><a href="http://www.sandlotscience.com/Illusion_Jump_Main/Master_Jump.htm">http://www.sandlotscience.com/Illusion_Jump_Main/Master_Jump.htm</a><br><a href="http://www.michaelbach.de/ot/">http://www.michaelbach.de/ot/</a>                                                                                                                                                                                                                                                                                                                                                                                                                                                                                                                                                                                                                                                                                                                                                                                                                                                                                                                                                                                                                    |
| <i>Resources for teaching about drugs and hormones</i>       |                                                                                                                                                                                                                                                                                                                                                                                                                                                                                                                                                                                                                                                                                                                                                                                                                                                                                                                                                                                                                                                                                                                                                                                                                                                                                                                                                                                                                                                                                 |
| Word searches                                                | <a href="http://faculty.washington.edu/chudler/findit6.html">http://faculty.washington.edu/chudler/findit6.html</a><br><a href="http://www.nida.nih.gov/PDF/MOM/MOMTeacherGuide.pdf">http://www.nida.nih.gov/PDF/MOM/MOMTeacherGuide.pdf</a><br><a href="http://www.hereinreality.com/word_search_puzzles/baseball_steroids.html">http://www.hereinreality.com/word_search_puzzles/baseball_steroids.html</a>                                                                                                                                                                                                                                                                                                                                                                                                                                                                                                                                                                                                                                                                                                                                                                                                                                                                                                                                                                                                                                                                   |
