# Supplementary material for: Neuroscience Workshops for Fifth-Grade School Children by Undergraduate Students: A University–School Partnership
Source: Atypon-hosted journal article supplement (doi:10.1187/cbe.05-08-0107), 2006-06-01
Supplement: supplementalmaterialc.pdf [file supplementalmaterialc.pdf]

## Appendix C

*Verbatim anonymous comments by the undergraduate students about the course*

“[This was] one of the best classes I’ve had. The hands-on development of the workshop and interaction with the children made for a great learning experience. I learned the material by developing the workshop but even more so through questions from the children and in trying to put things in words they could understand. This was a great course.” “I wouldn’t change a thing about ....the class”

"I liked that we were given so much responsibility and freedom to create it on our own. [The professor] was an excellent guide – I learned so much and it was fun at the same time. We learned to work together as a group, and how to overcome bumps in the road with research.”

“[She] is an amazing professor. Her zest for teaching facilitates students’ understanding of the material. I would take any class offered by her.”

“I have already recommended her to other students. [What was most beneficial was] that she was always available for consultation. Nothing that I am aware of [would have made this course more effective].”

“[Most beneficial about the course was] the teamwork involved, and good leadership provided, good guidance. [I wish I] could have taken the course earlier in college.”

“Excellent course. It was a lot of fun. [Most beneficial about the course was] going to the schools and doing the workshops. Nothing [would have made this course more effective]. It was perfect.”

“ I would love to take any class she teaches. She has made it a wonderful semester and taught me a lot. The team worked so well together.”

### Author Note

The authors wish to gratefully acknowledge the contribution of Loyola Marymount University students Jesse Maddex, Ana Ceci Mel, Aracely Mirón, and Heather Steffani during the planning, data collection, and analysis phases of this study. Portions of this paper were presented at the Stanford Undergraduate Research Conference in May 2004 and at the annual meeting of the Society for Neuroscience in San Diego, CA in October 2004. The authors are especially appreciative of the commitment to the project by school principals, teachers, and program directors. Most importantly, we would like to extend a special thank you to the children who made this such a fun and rewarding experience.
